# Supplementary material for: Preparation and microwave-absorbing property of BaFe12O19 nanoparticles and BaFe12O19/Fe3C/CNTs composites
Source: Royal Society of Chemistry journal article supplement (doi:10.1039/c5ra16310b), 2015-01-01
Supplement: c5ra16310b1.pdf [file c5ra16310b1.pdf]

## Supporting information

### **Preparation and microwave-absorbing property of BaFe<sub>12</sub>O<sub>19</sub> nanoparticles and BaFe<sub>12</sub>O<sub>19</sub>/Fe<sub>3</sub>C/CNTs composites**

Liangjun Yin<sup>1,ξ</sup>, Tong Chen<sup>1,ξ</sup>, Shiyu Liu<sup>1,ξ</sup>, Yuqi Gao<sup>1</sup>, Biao Wu<sup>1</sup>, Yufeng Wei,<sup>1</sup> Gang Li<sup>2</sup>, Xian Jian<sup>1,\*</sup> and Xin Zhang<sup>3,\*</sup>

<sup>1</sup> *School of Energy Science and Engineering, State key Laboratory of Electronic Thin Films and Integrated Devices, Center for Information in Biomedicine, University of Electronic Science and Technology of China, Chengdu, 611731, China*

<sup>2</sup> *Research Center for Eco-Environmental Sciences, Chinese Academy of Sciences, Beijing, 100085, China*

<sup>3</sup>*Key laboratory of Magnetic Levitation Technologies and Maglev Trains (Ministry of Education of China), Superconductivity and New Energy Center (SNEC), Southwest Jiaotong University; Chengdu, Sichuan 610031, China*

---

<sup>ξ</sup> Liangjun Yin, Tong Chen and Shiyu Liu contributed equally to this work.

\* Corresponding Authors: Email: [jianxian@uestc.edu.cn](mailto:jianxian@uestc.edu.cn) and [xzhang@my.swjtu.edu.cn](mailto:xzhang@my.swjtu.edu.cn)

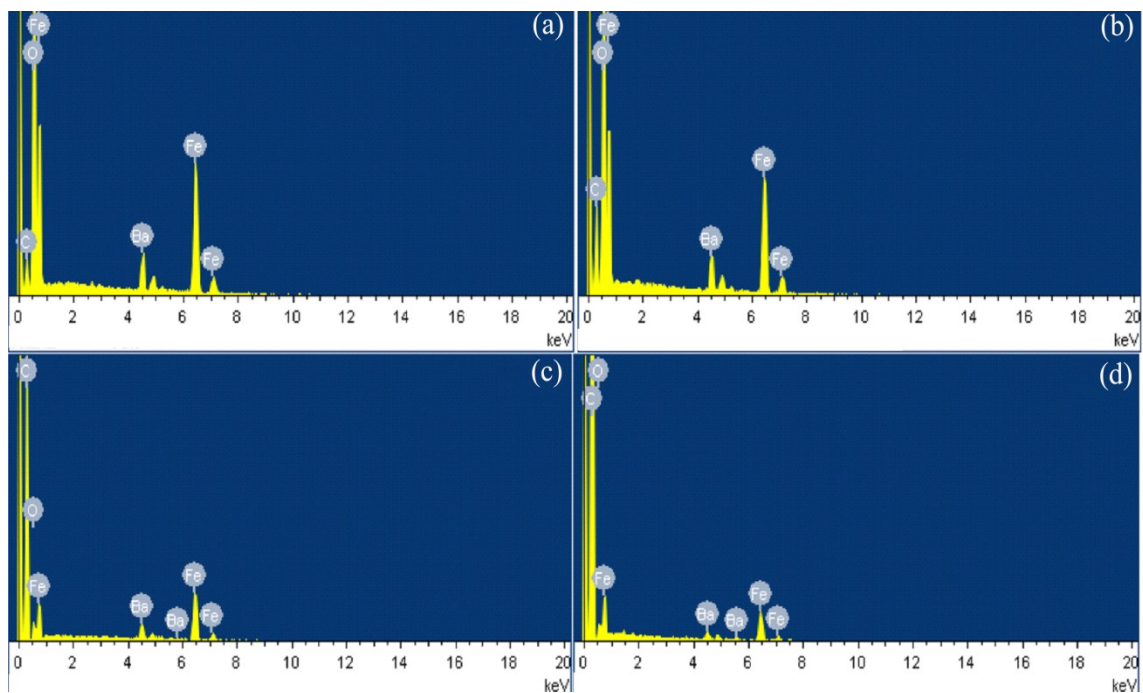

**Figure S1** EDX spectrum of BaFe<sub>12</sub>O<sub>19</sub>/Fe<sub>3</sub>C/CNTs composites obtained at (a) 450 °C, (b) 500 °C, (c) 550 °C and (d) 600 °C.

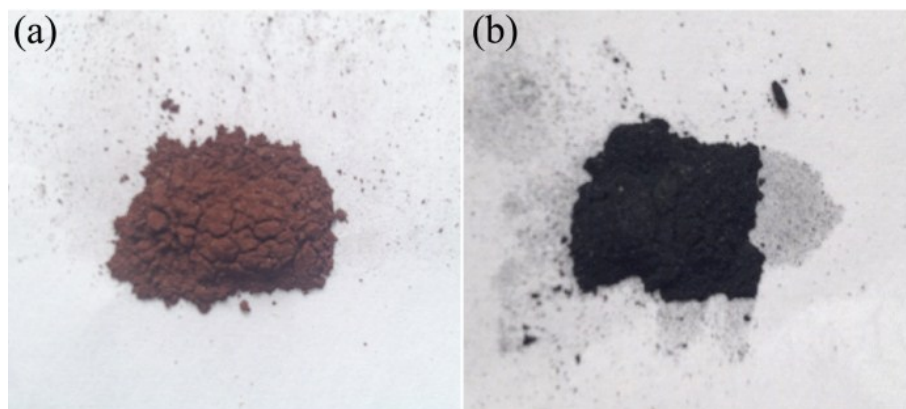

**Figure S2** Photographs of (a) BaFe<sub>12</sub>O<sub>19</sub> and (b) BaFe<sub>12</sub>O<sub>19</sub>/Fe<sub>3</sub>C/CNTs composites obtained at 400 °C - 600 °C.

**Table S1** The mass ratio and atomic ratio result of EDX characterization of BaFe<sub>12</sub>O<sub>19</sub>/Fe<sub>3</sub>C/CNTs composites obtained at (a) 450 °C, (b) 500 °C, (c) 550 °C and (d)600 °C.

| (a) Element | Mass ratio | Atomic ratio |
|-------------|------------|--------------|
| C K         | 0.18%      | 0.48%        |
| O K         | 32.72%     | 66.01%       |
| Fe K        | 51.72%     | 29.89%       |
| Ba L        | 15.39%     | 3.62%        |

  

| (b) Element | Mass ratio | Atomic ratio |
|-------------|------------|--------------|
| C K         | 0.48%      | 1.27%        |
| O K         | 33.04%     | 66.16%       |
| Fe K        | 50.12%     | 28.75%       |
| Ba L        | 16.36%     | 3.82%        |

  

| (c) Element | Mass ratio | Atomic ratio |
|-------------|------------|--------------|
| C K         | 7.36%      | 25.91%       |
| O K         | 7.19%      | 19.01%       |
| Fe K        | 64.01%     | 48.47%       |
| Ba L        | 21.44%     | 6.60%        |

  

| (d) Element | Mass ratio | Atomic ratio |
|-------------|------------|--------------|
| C K         | 24.72%     | 54.84%       |
| O K         | 11.44%     | 19.05%       |
| Fe K        | 48.47%     | 23.13%       |
| Ba L        | 15.37%     | 2.98%        |
